# Supplementary material for: Phenotypic characteristics and prognosis of inpatients with COVID-19 and diabetes: the CORONADO study
Source: Springer Nature journal article supplement (doi:10.1007/s00125-020-05180-x), 2020-05-29
Supplement: MOESM1 [file 18031484]

**ESM Table 1. Clinical characteristics prior to admission of CORONADO participants, according to primary outcome (tracheal intubation and/or death) and death, on day 7**

| Clinical features                                 | Number of people with available data | Primary outcome at day 7 |                   |         | Death at day 7    |                   |         |
|---------------------------------------------------|--------------------------------------|--------------------------|-------------------|---------|-------------------|-------------------|---------|
|                                                   |                                      | No (N= 935)              | Yes (N= 382)      | P value | No (N = 1177)     | Yes (N= 140)      | P value |
| <b>Sex (Female/Male)</b>                          | 1317                                 | 344/935 (36.8%)          | 118/382 (30.9%)   | 0.0420  | 419/1177 (35.6%)  | 43/140 (30.7%)    | 0.2529  |
| <b>Age (yrs)</b>                                  | 1317                                 | 69.7 ± 13.2              | 70 ± 12.5         | 0.6760  | 68.7 ± 12.9       | 79.4 ± 8.8        | <0.0001 |
| <b>Age class (yrs)</b>                            | 1317                                 |                          |                   | 0.0520  |                   |                   | <0.0001 |
| < 55                                              |                                      | 106/935 (11.3%)          | 53/382 (13.9%)    |         | 156/1177 (13.3%)  | 3/140 (2.1%)      |         |
| 55-64                                             |                                      | 206/935 (22.0%)          | 60/382 (15.7%)    | 0.0155  | 261/1177 (22.2%)  | 5/140 (3.6%)      | 0.9958  |
| 65-74                                             |                                      | 273/935 (29.2%)          | 121/382 (31.7%)   | 0.5479  | 371/1177 (31.5%)  | 23/140 (16.4%)    | 0.0595  |
| ≥75                                               |                                      | 350/935 (37.4%)          | 148/382 (38.7%)   | 0.3895  | 389/1177 (33.1%)  | 109/140 (77.9%)   | <0.0001 |
| <b>Type of diabetes</b>                           | 1317                                 |                          |                   | 0.4910  |                   |                   | 0.0062  |
| Type 2                                            |                                      | 828/935 (88.6%)          | 338/382 (88.5%)   |         | 1039/1177 (88.3%) | 127/140 (90.7%)   |         |
| Type 1                                            |                                      | 30/935 (3.2%)            | 9/382 (2.4%)      | 0.4243  | 37/1177 (3.1%)    | 2/140 (1.4%)      | 0.2650  |
| Other                                             |                                      | 46/935 (4.9%)            | 25/382 (6.5%)     | 0.2649  | 60/1177 (5.1%)    | 11/140 (7.9%)     | 0.2348  |
| Diagnosed on admission                            |                                      | 31/935 (3.3%)            | 10/382 (2.6%)     | 0.5239  | 41/1177 (3.5%)    | 0/140 (0%)        | -       |
| <b>Ethnicity</b>                                  | 1035                                 |                          |                   | 0.8029  |                   |                   | 0.0947  |
| EU                                                |                                      | 459/741 (61.9%)          | 182/294 (61.9%)   |         | 567/925 (61.3%)   | 74/110 (67.3%)    |         |
| MENA                                              |                                      | 141/741 (19.0%)          | 55/294 (18.7%)    | 0.9281  | 176/925 (19.0%)   | 20/110 (18.2%)    | 0.6032  |
| AC                                                |                                      | 126/741 (17.0%)          | 48/294 (16.3%)    | 0.8339  | 158/925 (17.1%)   | 16/110 (14.5%)    | 0.3817  |
| AS                                                |                                      | 15/741 (2.0%)            | 9/294 (3.1%)      | 0.3361  | 24/925 (2.6%)     | 0/110 (0%)        | -       |
| <b>BMI (kg/m<sup>2</sup>)</b>                     | 1117                                 | 28.1 [24.8; 32.0]        | 29.1 [25.9; 33.6] | 0.0009  | 28.5 [25.1; 32.7] | 27.7 [24.2; 32.5] | 0.6179  |
| <b>BMI class</b>                                  | 1117                                 |                          |                   | 0.0284  |                   |                   | 0.5592  |
| < 25 kg/m <sup>2</sup>                            |                                      | 215/797 (27.0%)          | 64/320 (20.0%)    |         | 247/1013 (24.4%)  | 32/104 (30.8%)    |         |
| 25-29.9 kg/m <sup>2</sup>                         |                                      | 294/797 (36.9%)          | 116/320 (36.2%)   | 0.1169  | 376/1013 (37.1%)  | 34/104 (32.7%)    | 0.1659  |
| 30-39.9 kg/m <sup>2</sup>                         |                                      | 238/797 (29.9%)          | 121/320 (37.8%)   | 0.0031  | 327/1013 (32.3%)  | 32/104 (30.8%)    | 0.2876  |
| ≥40 kg/m <sup>2</sup>                             |                                      | 50/797 (6.3%)            | 19/320 (5.9%)     | 0.4231  | 63/1013 (6.2%)    | 6/104 (5.8%)      | 0.5097  |
| <b>Diabetes duration (yrs)</b>                    | 772                                  | 13.6 ± 10.9              | 13.8 ± 10.7       | 0.8280  | 13.6 ± 10.8       | 13.9 ± 11.2       | 0.2193  |
| <b>HbA<sub>1c</sub> (mmol/mol)</b>                | 846                                  | 65.7 ± 21.3              | 64.8 ± 20.9       | 0.1853  | 65.5 ± 21.1       | 65.3 ± 21.5       | 0.8362  |
| <b>HbA<sub>1c</sub> (%)</b>                       | 846                                  | 8.2 ± 1.9                | 8.1 ± 1.9         | 0.1853  | 8.1 ± 1.9         | 8.1 ± 2.0         | 0.8362  |
| <b>HbA<sub>1c</sub> (categories)</b>              | 846                                  |                          |                   | 0.6963  |                   |                   | 0.3143  |
| < 53 mmol/mol (7 %)                               |                                      | 180/641 (28.1%)          | 65/205 (31.7%)    |         | 227/777 (29.2%)   | 18/69 (26.1%)     |         |
| 53-63 mmol/mol (7-7.9 %)                          |                                      | 175/641 (27.3%)          | 53/205 (25.9%)    | 0.4096  | 203/777 (26.1%)   | 25/69 (36.2%)     | 0.174   |
| 64-74 mmol/mol (8-8.9 %)                          |                                      | 123/641 (19.2%)          | 41/205 (20.0%)    | 0.7292  | 151/777 (19.4%)   | 13/69 (18.8%)     | 0.8281  |
| ≥ 75 mmol/mol (9 %)                               |                                      | 163/641 (25.4%)          | 46/205 (22.4%)    | 0.2645  | 196/777 (25.2%)   | 13/69 (18.8%)     | 0.6355  |
| <b>Hypertension</b>                               | 1299                                 | 704/924 (76.2%)          | 299/375 (79.7%)   | 0.1682  | 886/1162 (76.2%)  | 117/137 (85.4%)   | 0.0171  |
| <b>Dyslipidemia</b>                               | 1255                                 | 454/899 (50.5%)          | 186/356 (52.2%)   | 0.5769  | 567/1123 (50.5%)  | 73/132 (55.3%)    | 0.2959  |
| <b>Tobacco use</b>                                | 1029                                 |                          |                   | 0.2049  |                   |                   | 0.9249  |
| Never                                             |                                      | 431/742 (58.1%)          | 151/287 (52.6%)   |         | 530/936 (56.6%)   | 52/93 (55.9%)     |         |
| Former                                            |                                      | 274/742 (36.9%)          | 116/287 (40.4%)   | 0.1937  | 355/936 (37.9%)   | 35/93 (37.6%)     | 0.9831  |
| Current                                           |                                      | 37/742 (5.0%)            | 20/287 (7.0%)     | 0.1391  | 51/936 (5.4%)     | 6/93 (6.5%)       | 0.6901  |
| <b>Long-term diabetes complications</b>           |                                      |                          |                   |         |                   |                   |         |
| <b>Microvascular complications</b>                | 883                                  | 297/657 (45.2%)          | 116/226 (51.3%)   | 0.1120  | 345/798 (43.2%)   | 68/85 (80.0%)     | <0.0001 |
| Severe diabetic retinopathy                       | 954                                  | 46/701 (6.6%)            | 20/253 (7.9%)     | 0.4711  | 55/864 (6.4%)     | 11/90 (12.2%)     | 0.0409  |
| Diabetic kidney disease                           | 1066                                 | 256/773 (33.1%)          | 99/293 (33.8%)    | 0.8357  | 297/967 (30.7%)   | 58/99 (58.6%)     | <0.0001 |
| History of Diabetic Foot Ulcer                    | 1232                                 | 60/887 (6.8%)            | 16/345 (4.6%)     | 0.1661  | 65/1106 (5.9%)    | 11/126 (8.7%)     | 0.2104  |
| <b>Macrovascular complications</b>                | 1189                                 | 338/852 (39.7%)          | 147/337 (43.6%)   | 0.2120  | 399/1063 (37.5%)  | 86/126 (68.3%)    | <0.0001 |
| Ischemic heart disease (ACS/CAR)                  | 1251                                 | 237/890 (26.6%)          | 99/361 (27.4%)    | 0.7739  | 274/1117 (24.5%)  | 62/134 (46.3%)    | <0.0001 |
| Cerebrovascular disease (stroke or IAT)           | 1267                                 | 116/907 (12.8%)          | 47/360 (13.1%)    | 0.8985  | 133/1134 (11.7%)  | 30/133 (22.6%)    | 0.0005  |
| Peripheral artery disease (Major amputation/LLAR) | 1285                                 | 106/917 (11.6%)          | 39/368 (10.6%)    | 0.6225  | 120/1151 (10.4%)  | 25/134 (18.7%)    | 0.005   |
| <b>Comorbidities</b>                              |                                      |                          |                   |         |                   |                   |         |
| Heart failure                                     | 1206                                 | 106/861 (12.3%)          | 34/345 (9.9%)     | 0.2298  | 114/1083 (10.5%)  | 26/123 (21.1%)    | 0.0007  |
| NAFLD or liver cirrhosis                          | 1107                                 | 82/805 (10.2%)           | 37/302 (12.3%)    | 0.3238  | 110/994 (11.1%)   | 9/113 (8.0%)      | 0.3155  |
| Active Cancer                                     | 1282                                 | 136/915 (14.9%)          | 58/367 (15.8%)    | 0.6711  | 166/1147 (14.5%)  | 28/135 (20.7%)    | 0.0561  |
| COPD                                              | 1278                                 | 96/913 (10.5%)           | 37/365 (10.1%)    | 0.8417  | 115/1142 (10.1%)  | 18/136 (13.2%)    | 0.2548  |
| Treated OSA                                       | 1189                                 | 94/857 (11.0%)           | 50/332 (15.1%)    | 0.0533  | 120/1061 (11.3%)  | 24/128 (18.8%)    | 0.0160  |
| Organ graft                                       | 1302                                 | 26/925 (2.8%)            | 12/377 (3.2%)     | 0.7176  | 36/1164 (3.1%)    | 2/138 (1.4%)      | 0.2899  |
| End stage renal failure                           | 831                                  | 48/608 (7.9%)            | 12/223 (5.4%)     | 0.2176  | 55/728 (7.6%)     | 5/103 (4.9%)      | 0.3256  |

| Routine treatment before admission    |      |                 |                 |        |                  |                |         |
|---------------------------------------|------|-----------------|-----------------|--------|------------------|----------------|---------|
| Metformin                             | 1317 | 533/935 (57.0%) | 213/382 (55.8%) | 0.6788 | 683/1177 (58.0%) | 63/140 (45.0%) | 0.0035  |
| Sulfonylurea/glinides                 | 1317 | 259/935 (27.7%) | 108/382 (28.3%) | 0.8337 | 335/1177 (28.5%) | 32/140 (22.9%) | 0.1632  |
| DPP4-inhibitors                       | 1317 | 202/935 (21.6%) | 83/382 (21.7%)  | 0.9606 | 258/1177 (21.9%) | 27/140 (19.3%) | 0.4746  |
| GLP1-RA                               | 1317 | 80/935 (8.6%)   | 43/382 (11.3%)  | 0.1276 | 114/1177 (9.7%)  | 9/140 (6.4%)   | 0.2141  |
| Insulin                               | 1317 | 357/935 (38.2%) | 147/382 (38.5%) | 0.9191 | 434/1177 (36.9%) | 70/140 (50.0%) | 0.0027  |
| Loop diuretics                        | 1317 | 175/935 (18.7%) | 77/382 (20.2%)  | 0.5465 | 204/1177 (17.3%) | 48/140 (34.3%) | <0.0001 |
| Thiazide diuretics                    | 1317 | 186/935 (19.9%) | 81/382 (21.2%)  | 0.5913 | 239/1177 (20.3%) | 28/140 (20.0%) | 0.9322  |
| Potassium-sparing diuretics           | 1317 | 40/935 (4.3%)   | 19/382 (5.0%)   | 0.5800 | 49/1177 (4.2%)   | 10/140 (7.1%)  | 0.1116  |
| MRA                                   | 1317 | 38/935 (4.1%)   | 15/382 (3.9%)   | 0.9083 | 43/1177 (3.7%)   | 10/140 (7.1%)  | 0.0514  |
| Beta blockers                         | 1317 | 312/935 (33.4%) | 130/382 (34.0%) | 0.8173 | 377/1177 (32.0%) | 65/140 (46.4%) | 0.0007  |
| ACE inhibitors                        | 1317 | 243/935 (26.0%) | 111/382 (29.1%) | 0.2546 | 307/1177 (26.1%) | 47/140 (33.6%) | 0.0599  |
| ARBs                                  | 1317 | 265/935 (28.3%) | 124/382 (32.5%) | 0.1374 | 344/1177 (29.2%) | 45/140 (32.1%) | 0.4749  |
| ARBs and/or ACE inhibitors            | 1317 | 505/935 (54.0%) | 232/382 (60.7%) | 0.0259 | 645/1177 (54.8%) | 92/140 (65.7%) | 0.0146  |
| ARBs and/or ACE inhibitors and/or MRA | 1317 | 517/935 (55.3%) | 235/382 (61.5%) | 0.0386 | 657/1177 (55.8%) | 95/140 (67.9%) | 0.0070  |
| Statins                               | 1317 | 443/935 (47.4%) | 184/382 (48.2%) | 0.7950 | 555/1177 (47.2%) | 72/140 (51.4%) | 0.3388  |

Data are presented as numbers (%) and mean  $\pm$  SD, or median (25<sup>th</sup>; 75<sup>th</sup> percentile) if not normally distributed.

P values are calculated using Wald test (univariate logistic regression).

Ethnicity: EU (Europid), MENA (Middle East North Africa); AC (African or Caribbean), AS (Asian); Glycated A1c corresponds to the glycated hemoglobin determined in the 6 months prior to or in the first 7 days following hospital admission; GLP1-RA, Glucagon-like Peptide-Receptor Agonist; ACS, acute coronary syndrome; CAR, coronary artery revascularization ; IAT, ischemic transient accident; LLAR, lower limb artery revascularization; COPD, chronic obstructive pulmonary disease; OSA, obstructive sleep apnea. DKD, defined as eGFR 60 mL/min/1.73 m<sup>2</sup> or lower and/or proteinuria; NAFLD, non-alcoholic fatty liver disease; DPP4, Dipeptidyl peptidase 4; GLP-1RA, Glucagon-Like Peptide 1-Receptor Agonist; diuretics; ACE Inhibitors, angiotensin converting enzyme-inhibitors; ARB, angiotensin-2 receptor blocker; MRA, mineralocorticoid-receptor antagonist (i.e. spironolactone and eplerenone)

**ESM Table 2. COVID-19-related clinical, radiological and biological characteristics on admission in CORONADO participants, according to primary outcome (tracheal intubation and/or death) and death, on day 7**

|                                                                 | Number of persons with available data | Primary outcome at day 7 |                     |                | Death at day 7     |                     |                |
|-----------------------------------------------------------------|---------------------------------------|--------------------------|---------------------|----------------|--------------------|---------------------|----------------|
|                                                                 |                                       | No (N= 935)              | Yes (N= 382)        | <i>P value</i> | No (N = 1177)      | Yes (N= 140)        | <i>P value</i> |
| <b>COVID-19 symptoms</b>                                        | 1313                                  | 865/932 (92.8%)          | 372/381 (97.6%)     | 0.0012         | 1102/1174 (93.9%)  | 135/139 (97.1%)     | 0.1296         |
| <b>Time between symptom onset and hospital admission (days)</b> | 1302                                  | 5 [2; 8]                 | 5 [2; 8]            | 0.5319         | 5 [2; 8]           | 3 [1; 6]            | 0.0119         |
| <b>Clinical presentation</b>                                    |                                       |                          |                     |                |                    |                     |                |
| Fever                                                           | 1288                                  | 711/917 (77.5%)          | 292/371 (78.7%)     | 0.6467         | 904/1152 (78.5%)   | 99/136 (72.8%)      | 0.1326         |
| Fatigue                                                         | 1239                                  | 545/887 (61.4%)          | 228/352 (64.8%)     | 0.2754         | 690/1111 (62.1%)   | 83/128 (64.8%)      | 0.5450         |
| Cough                                                           | 1270                                  | 628/914 (68.7%)          | 244/356 (68.5%)     | 0.9533         | 787/1141 (69.0%)   | 85/129 (65.9%)      | 0.4745         |
| Cephalalgia                                                     | 1193                                  | 118/864 (13.7%)          | 39/329 (11.9%)      | 0.4107         | 149/1072 (13.9%)   | 8/121 (6.6%)        | 0.0285         |
| Dyspnea                                                         | 1292                                  | 513/919 (55.8%)          | 285/373 (76.4%)     | <0.0001        | 692/1155 (59.9%)   | 106/137 (77.4%)     | 0.0001         |
| Rhinitis and/or pharyngeal signs                                | 1178                                  | 85/851 (10.0%)           | 26/327 (8.0%)       | 0.2849         | 106/1059 (10.0%)   | 5/119 (4.2%)        | 0.0469         |
| Agueusia and/or Anosmia                                         | 1073                                  | 106/781 (13.6%)          | 30/292 (10.3%)      | 0.1496         | 131/973 (13.5%)    | 5/100 (5.0%)        | 0.0206         |
| Digestive disorders                                             | 1236                                  | 317/887 (35.7%)          | 110/349 (31.5%)     | 0.1605         | 386/1108 (34.8%)   | 41/128 (32%)        | 0.5274         |
| <b>Chest CT imaging</b>                                         |                                       |                          |                     |                |                    |                     |                |
| Abnormal chest CT                                               | 896                                   | 609/648 (94.0%)          | 235/248 (94.8%)     | 0.6567         | 763/815 (93.6%)    | 81/81 (100%)        | -              |
| Ground-glass opacity/crazy paving                               | 818                                   | 522/589 (88.6%)          | 214/229 (93.4%)     | 0.0416         | 663/740 (89.6%)    | 73/78 (93.6%)       | 0.2690         |
| <b>Biological findings</b>                                      |                                       |                          |                     |                |                    |                     |                |
| Positive SARS-CoV-2 PCR                                         | 1268                                  | 865/900 (96.1%)          | 362/368 (98.4%)     | 0.0455         | 1094/1132 (96.6%)  | 133/136 (97.8%)     | 0.4767         |
| Admission plasma glucose (mmol/l)                               | 940                                   | 8.80 [6.70; 12.10]       | 10.30 [7.10; 14.53] | 0.0005         | 9.00 [6.80; 12.44] | 10.40 [7.16; 13.90] | 0.0775         |
| Plasma creatinine (μmol/l)                                      | 1196                                  | 88.0 [67.0; 125]         | 100 [73.5; 150]     | 0.0005         | 89.0 [67.6; 126]   | 123 [86.5; 177]     | <0.0001        |
| eGFR (CKD-EPI) (ml/min/1.73 m <sup>2</sup> )                    | 1196                                  | 72.0 [44.6; 90.6]        | 59.4 [36.9; 85.5]   | 0.0016         | 72.0 [44.9; 91.5]  | 43.1 [29.7; 69.0]   | <0.0001        |
| ALT (%ULN)                                                      | 1068                                  | 0.58 [0.40; 0.94]        | 0.71 [0.46; 1.10]   | 0.0007         | 0.62 [0.42; 1.00]  | 0.58 [0.38; 0.81]   | 0.1354         |
| AST (%ULN)                                                      | 1053                                  | 0.97 [0.68; 1.34]        | 1.32 [0.94; 1.96]   | <0.0001        | 1.03 [0.74; 1.46]  | 1.27 [0.93; 1.86]   | 0.0005         |
| GGT (%ULN)                                                      | 983                                   | 0.92 [0.55; 1.60]        | 1.11 [0.62; 2.07]   | 0.0009         | 0.95 [0.56; 1.77]  | 0.83 [0.51; 1.50]   | 0.7801         |
| Hemoglobin (g/dl)                                               | 1276                                  | 12.9 [11.5; 14.3]        | 12.8 [11.3; 14.4]   | 0.3924         | 12.9 [11.4; 14.3]  | 12.7 [11.1; 14.3]   | 0.6311         |
| White cell count (10 <sup>3</sup> /mm <sup>3</sup> )            | 1269                                  | 6320 [4870; 8400]        | 6650 [5118; 9400]   | 0.0001         | 6400 [4890; 8462]  | 7380 [5530; 10100]  | 0.0001         |
| Lymphocyte count (10 <sup>3</sup> /mm <sup>3</sup> )            | 1211                                  | 1030 [700; 1492]         | 820 [595; 1200]     | <0.0001        | 1000 [700; 1408]   | 880 [500; 1150]     | 0.0075         |
| Platelet count (10 <sup>3</sup> /mm <sup>3</sup> )              | 1273                                  | 198 [156; 249]           | 182 [142; 233]      | 0.0134         | 194 [152; 246]     | 176 [136; 238]      | 0.0860         |
| D-dimers (μg/l)                                                 | 397                                   | 820 [364; 1570]          | 850 [330; 1732]     | 0.5155         | 809 [337; 1568]    | 1130 [639; 1746]    | 0.2742         |
| C reactive protein, (mg/l)                                      | 1208                                  | 66 [31.1; 119]           | 110.4 [68.8; 179.5] | <0.0001        | 75 [36; 127]       | 113 [54; 179.3]     | 0.0002         |
| LDH (UI/l)                                                      | 566                                   | 323 [249; 425]           | 440 [334; 638]      | <0.0001        | 342 [265; 474]     | 451 [352; 638]      | 0.0142         |
| CPK (UI/l)                                                      | 549                                   | 122 [64; 265]            | 204 [100; 455]      | <0.0001        | 134 [69; 295]      | 253 [150; 522]      | <0.0001        |
| Fibrinogen (g/l)                                                | 658                                   | 5.8 [4.7; 7.0]           | 6.3 [5.2; 7.4]      | 0.0037         | 6 [4.8; 7.2]       | 6.2 [5.0; 6.8]      | 0.6810         |

Data are presented as numbers (%) and mean ± SD, or median (25<sup>th</sup>; 75<sup>th</sup> percentile) if not normally distributed. P values are calculated using Wald test (univariate logistic regression).

eGFR, estimated glomerular filtration rate, according to the CKD-EPI formula; ALT, alanine aminotransferase; AST, aspartate aminotransferase; GGT, gamma-glutamyl transferase; LDH, lactate dehydrogenase; CPK, creatine phosphokinase; CRP, C reactive protein; ULN, Upper limit of normal;

### **Scientific committee (City, Scientific domain):**

S Hadjadj, (Nantes, Diabetology) Chairman; B Cariou, (Nantes, Diabetology) Principal Investigator, National Coordinator; B Bauduceau (Paris, Diabetology Gerontology) on behalf of FFRD; D Boutoille (Nantes, Infectiology); C Chaumeil (Paris, patients association) on behalf of Fédération Française des Diabétiques; JF Gautier (Paris, Diabetology); P Gourdy (Toulouse, Diabetology); V Kerlan (Brest, Diabetology), on behalf of SFE; B Laviolle (Rennes, Epidemiology); F Cazenave-Roblot (Poitiers, Infectiology), on behalf of SPILF; M Pichelin (Nantes, Study manager); R Robert (Poitiers, Intensive Care); R Roussel (Paris, Diabetology); JF Thebaut (Paris, patients association) on behalf of Fédération Française des Diabétiques; C Thivolet (Lyon, Diabetology), on behalf of SFD; M Wargny (Nantes, Methodology).

### **List of collaborators**

MAHOT Pascale, CHU de Nantes, Nantes, France, pascale.moreau@chu-nantes.fr

HADJADJ Samy, CHU de Nantes, Nantes, France, samy.hadjadj@univ-nantes.fr

FOURNIER-GUILLOUX Anne-Laure, CHU de Nantes, Nantes, France, annelaure.fournierguilloux@chu-nantes.fr

MAUDUIT Nicolas, CHU de Nantes, Nantes, France, nicolas.mauduit@chu-nantes.fr

BIGOT- CORBEL Edith, CHU de Nantes, Nantes, France, edith.bigot@chu-nantes.fr

BOUREAU Anne-Sophie, CHU de Nantes, Nantes, France, annesophie.boureau@chu-nantes.fr

DE DECKER Laure, CHU de Nantes, Nantes, France, laure.dedecker@chu-nantes.fr

ERNOULD Audrey, CHU de Nantes, Nantes, France, audrey.ernould@chu-nantes.fr

PRIMOT Claire, CHU de Nantes, Nantes, France, claire.primot@chu-nantes.fr

SEGUIN Anne, CHU de Nantes, Nantes, France, anne.seguin@chu-nantes.fr

JOLIVEAU Marielle, CHU de Nantes, Nantes, France, marielle.joliveau@chu-nantes.fr

POUVREAU Sonia, CHU de Nantes, Nantes, France, sonia.pouvreau@chu-nantes.fr

FOURNIER Chloé, CHU de Nantes, Nantes, France, chloe.fournier@chu-nantes.fr

THUREAU Jeremy, CHU de Nantes, Nantes, France, jeremy.thureau@chu-nantes.fr

FONTENEAU Edith, CHU de Nantes, Nantes, France, edith.fonteneau@chu-nantes.fr

HUBLAIN Pamela, CHU de Nantes, Nantes, France, Pamela.HUBLAIN@chu-nantes.fr

AGASSE Carole, CHU de Nantes, Nantes, France, Carole.AGASSE@chu-nantes.fr

DE KERGADEDEC Mathilde, CHU de Nantes, Nantes, France, laurence.dekergadec@chu-nantes.fr

MINVILLE Vincent, CHU Toulouse, Toulouse, France, minville.v@chu-toulouse.fr

VARDON-BOUNES Fanny, CHU Toulouse, Toulouse, France, bounes.f@chu-toulouse.fr

MARTIN-BLONDEL Guillaume, CHU Toulouse, Toulouse, France, martin-blondel.g@chu-toulouse.fr

TURNIN Marie-Christine, CHU Toulouse, Toulouse, France, turnin.mc@chu-toulouse.fr

HANAIRE H el ene, CHU Toulouse, Toulouse, France, hanaire.h@chu-toulouse.fr

MANSUY Jean-Michel, CHU Toulouse, Toulouse, France, mansuy.jm@chu-toulouse.fr

FABRE Didier, CHU Toulouse, Toulouse, France, fabre.d@chu-toulouse.fr

ARHAINX Marie-Blanche, CHU Toulouse, Toulouse, France, arhainx.mb@chu-toulouse.fr

CAZALS Laurent, CHU Toulouse, Toulouse, France, cazals.l@chu-toulouse.fr

COMBES Laure, CHU Toulouse, Toulouse, France, combes.l@chu-toulouse.fr

LAMI Emmanuelle, CHU Toulouse, Toulouse, France, lami.e@chu-toulouse.fr

CIANFERANI Mallory, CHU Toulouse, Toulouse, France, cianferani.m@chu-toulouse.fr

MEGARBANE Bruno, H opital LARIBOISIERE, Paris, France, bruno.megarbane@aphp.fr

LEROY Pierre, H opital LARIBOISIERE, Paris, France, pierre.leroy@aphp.fr

VIDAL-TRECAN Tiphaine, H opital LARIBOISIERE, Paris, France, tiphaine.vidal-trecan@aphp.fr

LAPLANCHE Jean-Louis, H opital LARIBOISIERE, Paris, France, jean-louis.laplanche@aphp.fr

MOULY St ephane, H opital LARIBOISIERE, Paris, France, stephane.mouly@aphp.fr

TAHER Malak, H opital BICHAT, Paris, France, malak.taher@aphp.fr

ABOULEKA Yawa, H opital BICHAT, Paris, France, yawa.abouleka@aphp.fr

YAKER Fetta, H opital BICHA, Paris, France, fettaamel.yaker@aphp.fr

CARLIER Aurelie, H opital BICHAT, Paris, France, aurelie.carlier@aphp.fr

BOUTTEN Anne, H opital BICHAT, Paris, France, anne.boutten@aphp.fr

HALLOT-FERON Marilyne, H opital BICHAT, Paris, France, marilyne.feron@aphp.fr

MOURAH Fadila, H opital BICHAT, Paris, France, fadila.mourah@gmail.com

BLOND Emilie, H opital Lyon Sud, Pierre B enite, France, emilie.blond@chu-lyon.fr

ROLLAND Muriel, H opital Lyon Sud, Pierre B enite, France, muriel.rolland@chu-lyon.fr

VERDECHO MENDEZ Josep, H opital Lyon Sud, Pierre B enite, France, josep.verdecho-mendez@chu-lyon.fr

ALEXANDRE Marine, H opital Lyon Sud, Pierre B enite, France, marine.alexandre@chu-lyon.fr

POTTECHER Julien, Nouvel h opital civil, Strasbourg, France, julien.pottecher@chru-strasbourg.fr

RICHER Emilie, Nouvel h opital civil, Strasbourg, France, emilie.richerdupont@chru-strasbourg.fr

LUCA Florina, H opital Hautepierre, Strasbourg, France, florina.luca@chru-strasbourg.fr

LESSINGER Jean-Marc, Nouvel h opital civil, Strasbourg, France, Jean-Marc.LESSINGER@chru-strasbourg.fr

BAHOUGNE Thibault, Hospices civils, Strasbourg, France, thibault.bahougne@chru-strasbourg.fr

GUERCI Bruno, CHU Brabois Université de Lorraine, Nancy, France, b.guerci@chru-nancy.fr

LUDWIG Lisa, CHU Brabois Université de Lorraine, Nancy, France, L.LUDWIG@chru-nancy.fr

BENZIRAR Siham, CHU Brabois Université de Lorraine, Nancy, France, s.benzirar@chru-nancy.fr

MALAPLATE Catherine, CHU Brabois Université de Lorraine, Nancy, France, c.malaplate@chu-nancy.fr

MATTON Thierry, CHU Brabois Université de Lorraine, Nancy, France, t.matton@chru-nancy.fr

POISSY Julien, Hôpital salengro CHU, Lille, France, julien.poissy@chru-lille.fr

FAURE Karine, Hôpital Huriez CHRU, Lille, France, karine.faure@chru-lille.fr

FONTAINE Pierre, Hôpital Huriez CHRU, Lille, France, pierre.fontaine@chru-lille.fr

VAMBERGUE Anne, Hôpital Huriez CHRU, Lille, France, anne.vambergue@chru-lille.fr

PEKAR Jean David, Hôpital Huriez CHRU, Lille, France, jeandavid.PEKAR@chru-lille.fr

LAMBERT Marc, Hôpital Calmette CHU, Lille, France, marc.lambert@chru-lille.fr

YELNIK Cécile, Hôpital Calmette CHU, Lille, France, cecile.yelnik@chru-lille.fr

BRUANDET Amélie, Hôpital Huriez CHRU, Lille, France, amelie.bruandet@chru-lille.fr

PETIT Laurent, CHU de Bordeaux, Bordeaux, France, laurent.petit@chu-bordeaux.fr

NEAU Didier, CHU de Bordeaux, Bordeaux, France, didier.neau@chu-bordeaux.fr

RIGALLEAU Vincent, CHU de Bordeaux, Pessac, France, vincent.rigalleau@chu-bordeaux.fr

BERARD Annie, CHU de Bordeaux, Bordeaux, France, annie.berard@chu-Bordeaux.fr

GALIOOT Amandine, CHU de Bordeaux, Pessac, France, amandine.galioot@chu-bordeaux.fr

COUDROY Remy, CHU Poitiers, Poitiers, France, Remi.COUDROY@chu-poitiers.fr

THILLE Arnaud, CHU Poitiers, Poitiers, France, arnaud.thille@chu-poitiers.fr

RAMMAERT Blandine, CHU Poitiers, Poitiers, France, blandine.rammaert@chu-poitiers.fr

PIGUEL Xavier, CHU Poitiers, Poitiers, France, xavier.piguel@chu-poitiers.fr

BENHENDA Nesrine, CHU Poitiers, Poitiers, France, Nesrine.BENHENDA@chu-poitiers.fr

HUSSON Camille, CHU Poitiers, Poitiers, France, Camille.HUSSON@chu-poitiers.fr

OLIVIER Celine, CHU Poitiers, Poitiers, France, celine.olivier@chu-poitiers.fr

TORREMOCHA Florence, CHU Poitiers, Poitiers, France, florence.torremocha@chu-poitiers.fr

FRATY Mathilde, CHU Poitiers, Poitiers, France, mathilde.fraty@chu-poitiers.fr

FLAMEN D'ASSIGNY Marie, CHU Poitiers, Poitiers, France, marie.flamen-dassigny@chu-poitiers.fr

MIOT Aurelie, CHU Poitiers, Poitiers, France, aurelie.miot@chu-poitiers.fr

BOSSARD Valentin, CHU Poitiers, Poitiers, France, valentin.bossard988@gmail.com

KLOUCHE Kada, Hôpital Lapeyronie, Chu Montpellier, France, k-klouche@chu-montpellier.fr

MAKINSON Alain, Hôpital Lapeyronie, Chu Montpellier, France, a-makinson@chu-montpellier.fr

BONNET Jean-Baptiste, Hôpital Lapeyronie, Chu Montpellier, France, jean-baptiste-bonnet@chu-montpellier.fr

FOULONGNE Vincent, Hôpital St Eloi, Chu Montpellier, France, v-foulongne@chu-montpellier.fr

GALTIER Florence, Hôpital St Eloi, Chu Montpellier, France, f-galtier@chu-montpellier.fr

AUBRON Cécile, CHU de Brest, Brest, France, cecile.aubron@ch-brest.fr

ANSART Séverine, CHU de Brest, Brest, France, severine.ansart@chu-brest.fr

QUINIOU Pascale, CHU de Brest, Brest, France, pascale.quiniou@chu-brest.fr

CARRE Jean- Luc, CHU de Brest, Brest, France, jean-luc.carre@chu-brest.fr

QUESNOT Stéphane, CHU de Brest, Brest, France, stephane.quesnot@chu-brest.fr

SCHWEBEL Carole, CHU Grenoble Alpes, Grenoble, France, Cschwebel@chu-grenoble.fr

EPAULARD Olivier, CHU Grenoble Alpes, Grenoble, France, OEpaulard@chu-grenoble.fr

BENHAMOU Pierre-Yves, CHU Grenoble Alpes, Grenoble, France, PYBenhamou@chu-grenoble.fr

BETRY Cécile, CHU Grenoble Alpes, Grenoble, France, Cbetry@chu-grenoble.fr

BOREL Anne-Laure, CHU Grenoble Alpes, Grenoble, France, ALBorel@chu-grenoble.fr

LABLANCHE Sandrine, CHU Grenoble Alpes, Grenoble, France, Slablanch@chu-grenoble.fr

GUERGOUR Dorra, CHU Grenoble Alpes, Grenoble, France, Dguergour@chu-grenoble.fr

DUCLOS Catherine, Hôpital AVICENNE, Bobigny, France, catherine.duclos@aphp.fr

GUYOT Erwan, Hôpital AVICENNE, Bobigny, France, erwan.guyot@aphp.fr

DENIAU Aurore, Hôpital AVICENNE, Bobigny, France, aurore.deniau@aphp.fr

NGUYEN Phucthtrang, Hôpital AVICENNE, Bobigny, France, phucthtrang.nguyen@aphp.fr

REZNIK Yves, CHU Caen Normandie, Caen, France, reznik-y@chu-caen.fr

ALLOUCHE Stéphane, CHU Caen Normandie, Caen, France, allouche-s@chu-caen.fr

GUITTET Lydia, CHU Caen Normandie, Caen, France, guittet-l@chu-caen.fr

GRANGE Steven, CHU Rouen, Rouen, France, steven.grange@chu-rouen.fr

ETIENNE Manuel, CHU Rouen, Rouen, France, manuel.etienne@chu-rouen.fr

BRUNEL Valéry, CHU Rouen, Rouen, France, valery.brunel@chu-rouen.fr

LAGIER Jean-Christophe, IHU Marseille, Marseille, France, JeanChristophe.LAGIER@ap-hm.fr

RAOULT Didier, IHU Marseille, Marseille, France, didier.raoult@ap-hm.fr

DUTOUR Anne, CHU Nord et Conception, Marseille, France, anne.dutour@ap-hm.fr

BOULLLU Sandrine, CHU Nord, Marseille, France, sandrine.boullu@ap-hm.fr

CERINO Mathieu, CHU Conception, Marseille, France, mathieu.cerino@ap-hm.fr

ROMAIN Fanny, CHU Conception, Marseille, France, fanny.romain@ap-hm.fr

HOUSSAYS Marie, CHU Conception, Marseille, France, marie.houssays@ap-hm.fr

QUENOT Jean Pierre, CHU François Mitterand, Dijon, France, jean-pierre.quenot@chu-dijon.fr

PIROTH Lionel, CHU François Mitterand, Dijon, France, lionel.piroth@chu-dijon.fr

VERGÈS Bruno, CHU François Mitterand, Dijon, France, bruno.verges@chu-dijon.fr

DUVILLARD Laurence, CHU François Mitterand, Dijon, France, laurence.duvillard@chu-dijon.fr

BONNOTTE Bernard, CHU François Mitterrand, Dijon, France, bernard.bonnotte@chu-dijon.fr

MERCAT Alain, CHU ANGERS, Angers, France, almercat@chu-angers.fr

DUBEE Vincent, CHU ANGERS, Angers, France, vincent.dubee@chu-angers.fr

RODIEN Patrice, CHU ANGERS, Angers, France, parodien@chu-angers.fr

REYNIER Pascal, CHU ANGERS, Angers, France, pareynier@chu-angers.fr

LARCHER Françoise, CHU ANGERS, Angers, France, frjoubaud@chu-angers.fr

JOUBAUD Françoise, CHU ANGERS, Angers, France, frjoubaud@chu-angers.fr

ANDREU Marie-Rita, CHU ANGERS, Angers, France, marierita.andreu@chu-angers.fr

URBANSKI Geoffrey, CHU ANGERS, Angers, France, geoffrey.urbanski@chu-angers.fr

HUBERT Laurent, CHU ANGERS, Angers, France, lahubert@chu-angers.fr

ANNWEILER Cedric, CHU ANGERS, Angers, France, ceannweiler@chu-angers.fr

DELLAMONICA Jean, CHU de Nice - Hôpital de l'Archet, Nice, France, dellamonica.j@chu-nice.fr

COURJON Johan, CHU de Nice - Hôpital de l'Archet, Nice, France, courjon.j@chu-nice.fr

CHEVALIER Nicolas, CHU de Nice - Hôpital de l'Archet, Nice, France, chevalier.n@chu-nice.fr

CHINETTI Giulia, CHU de Nice - Hôpital Pasteur, Nice, France, chinetti.g@chu-nice.fr

CHAFAI Magda, CHU de Nice - Hôpital de l'Archet, Nice, France, chafai.m@chu-nice.fr

MOURVILLIER Bruno, CHU de Reims, Reims, France, bmourvillier@chu-reims.fr

BANI-SADR Firouze, CHU de Reims, Reims, France, fbanisadr@chu-reims.fr

DELEMER Brigitte, CHU de Reims, Reims, France, bdelemer@chu-reims.fr

GILLERY Philippe, CHU de Reims, Reims, France, pgillery@chu-reims.fr

LABEDADE Pascale, Centre Hospitalier Sud-Francilien, Corbeil-Essonnes, France, pascale.labeledade@chsf.fr

CHABROL Amélie, Centre Hospitalier Sud-Francilien, Corbeil-Essonnes, France, amelie.chabrol@chsf.fr

PENFORNIS Alfred, Centre Hospitalier Sud-Francilien, Corbeil-Essonnes, France, alfred.penfornis@chsf.fr

PETIT Catherine, Centre Hospitalier Sud-Francilien, Corbeil-Essonnes, France, catherine.petit@chsf.fr

ADLER Maxime, Centre Hospitalier Sud-Francilien, Corbeil-Essonnes, France, maxime.adler@chsf.fr

DUBOST Clément, HIA Bégin, Saint Mandé, France, clement.dubost@intra.def.gouv.fr

CONAN Pierre-Louis, HIA Bégin, Saint Mandé, France, pierre-louis.conan@intra.def.gouv.fr

BORDIER Lyse, HIA Bégin, Saint Mandé, France, lyse.bordier@intra.def.gouv.fr

CEPPA Franck, HIA Bégin, Saint Mandé, France, franck.ceppa@intra.def.gouv.fr

GARCIA Cyril, HIA Bégin, Saint Mandé, France, cyril1.garcia@intra.def.gouv.fr

SOLLIER Mathilde, HIA Bégin, Saint Mandé, France, mathilde.sollier@intra.def.gouv.fr

DUPUY Olivier, GH Paris Saint Joseph, Paris, France, odupuy@hpsj.fr

LAPLANCE Sophie, GH Paris Saint Joseph, Paris, France, slaplanche@hpsj.fr

BILLUART Olivier, GH Paris Saint Joseph, Paris, France, obilluart@hpsj.fr



AROUNDLAND Marie Joseph, GH Paris Saint Joseph, Paris, France, mjaroulanda@hpsj.fr

OLIVIER Frédérique, CH CAHORS, Cahors, France, frederique.olivier@ch-cahors.fr

AYON Florence, CH CAHORS, Cahors, France, florence.ayon@ch-cahors.fr

WILHELM Nathalie, CH CAHORS, Cahors, France, nathalie.wilhelm@ch-cahors.fr

EPELBOIN Loic, CHU Cayennes, Cayenne, France, loic.epelboin@ch-cayenne.fr

SABBAH Nadia, CHU Cayennes, Cayenne, France, nadia.sabbah@ch-cayenne.fr

CHARPIN Aurelie, CHU Cayennes, Cayenne, France, aurelie.charpin@ch-cayenne.fr

SQUARA Pierre, Clinique Ambroise Paré, Paris, France, pierre.squara@orange.fr

BELLIARD Olivier, Clinique Ambroise Paré, Paris, France, olivier\_belliard@yahoo.fr

DUBOIS Claude, Clinique Ambroise Paré, Paris, France, claude.dubois@clinique-a-pare.fr

MARRE Michel, Clinique Ambroise Paré, Paris, France, marre.michel@gmail.com

AUCHABIE Johann, CH Cholet, Cholet, France, johann.auchabie@ch-cholet.fr

COURTOIS Roxane, CH Cholet, Cholet, France, roxane.courtois@ch-cholet.fr

DURIEZ Thierry, CH Cholet, Cholet, France, thierry.duriez@ch-cholet.fr

MERGEY Tiphaine, CH Cholet, Cholet, France, tiphaine.mergey@ch-cholet.fr

VALLEE Laura, CH Cholet, Cholet, France, laura.vallee@ch-cholet.fr

SEGUIN Laetitia, CH Cholet, Cholet, France, laetitia.seguin@ch-cholet.fr

LANOIX Jean-Philippe, CHU Amiens- Picardie, Amiens, France, lanoix.jean-philippe@chu-amiens.fr

SORIOT-THOMAS Sandrine, CHU Amiens-Picardie, Amiens, France, soriot-thomas.sandrine@chu-amiens.fr

BOURGEOIS-DESCOULS Anne-Marie, CHU Amiens-Picardie, Amiens, France, bourgeois.anne-marie@chu-amiens.fr

DESAILLUD Rachel, CHU Amiens-Picardie, Amiens, France, dessaillud.rachel@chu-amiens.fr

GERMAIN Natacha, CHU de Saint Etienne, Saint Etienne, France, natacha.germain@chu-st-etienne.fr

GALUSCA Bogdan, CHU de Saint Etienne, Saint Etienne, France, bogdan.galusca@chu-st-etienne.fr

BELLETON Gwenaëlle, CHU de Saint Etienne, Saint Etienne, France, gwenaëlle.belleton@chu-st-etienne.fr

MAROUANI Nesrine, CHU de Saint Etienne, Saint Etienne, France, nesrine.marouani@chu-st-etienne.fr

PALAGHIU Delia, CHU de Saint Etienne, Saint Etienne, France, delia.palaghiu@chu-st-etienne.fr

HAMMOUR Amira, CHU de Saint-Etienne, Saint-Etienne, France, amira.hammour@chu-st-etienne.fr

BERDAGUER Fernando, Hôpital Nord Franche-Comté, Belfort, France, fberdaguer@hotmail.com

WINISZEWSKI Patrice, Hôpital Nord Franche-Comté, Belfort, France, patrice.winiszewski@hnfc.fr

KLOPFENSTEIN Thimothée, Hôpital Nord Franche-Comté, Belfort, France, Timothee.KLOPFENSTEIN@hnfc.fr

ZAYET Hajer, Hôpital Nord Franche-Comté, Belfort, France, Hajer.ZAYET@hnfc.fr

WINISZEWSKI Patrice, Hôpital Nord Franche-Comté, Belfort, France, Patrice.WINISZEWSKI@hnfc.fr

ZANUSSO Marie, Hôpital Nord Franche-Comté, Belfort, France, marie.zanusso@hnfc.fr

GARNIER Pauline, Hôpital Nord Franche-Comté, Belfort, France, pauline.garnier@hnfc.fr

JULIER Ingrid, CH de Ales, Ales, France, dr.julier@ch-ales.fr

HAMZAOUI Karim, CH de Ales, Ales, France, dr.hamzaoui@ch-ales.fr

MARTY-GRES Sophie, CH de Ales, Ales, France, biologie@ch-ales.fr

EL SADKI Tarik, CH de Ales, Ales, France, biologie@ch-ales.fr

CADOT Lucile, CH de Ales, Ales, France, biologie@ch-ales.fr

DUBOST Jean-Louis, CH de Pontoise, Pontoise, France, jean-louis.dubost@ght-novo.fr

GONFROY Céline, CH de Pontoise, Pontoise, France, celine.gonfroy@ght-novo.fr

CAMPINOS Catherine, CH de Pontoise, Pontoise, France, catherine.campinos@ght-novo.fr

MARTRES Pascale, CH de Pontoise, Pontoise, France, pascale.martres@ght-novo.fr

COULHON Marie Pierre, CH de Pontoise, Pontoise, France, marie-pierre.coulhon@ght-novo.fr

FLAUS FURMANIUK Anna, CHU Felix Guyon, Saint Denis, France, [anna.flaus-furmaniuk@chu-reunion.fr](mailto:anna.flaus-furmaniuk@chu-reunion.fr)

ALLOU Nicolas, CHU Felix Guyon, Saint Denis, France, nicolas.allou@chu-reunion.fr

BACHIR Marwa, CHU Felix Guyon, Saint Denis, France, marwa.bachir@chu-reunion.fr

HOANG Stella, CHU Felix Guyon, Saint Denis, France, stella.hoang@chu-reunion.fr

KEMBELLEC Candice, CHU Felix Guyon, Saint Denis, France, candice.kembellec@chu-reunion.fr

SUPLY Olivia, CHU Felix Guyon, Saint Denis, France, olivia.sply@chu-reunion.fr

KHARCHA Fatima, CHU Felix Guyon, Saint Denis, France, fatima.kharcha@chu-reunion.fr

DEVOUGE Anne-Claire, CHU Felix Guyon, Saint Denis, France, anne-claire.devouge@chu-reunion.fr

FLAUS-FURMANUK Anna, CHU Felix Guyon, Saint Denis, France, anna.flaus-furmaniuk@chu-reunion.fr

BASTARD Sophie, CHU Felix Guyon, Saint Denis, France, sophie.bastard@chu-reunion.fr

RAFFRAY Loic, CHU Felix Guyon, Saint Denis, France, loic.raffray@chu-reunion.fr

RENOU Frederic, CHU Felix Guyon, Saint Denis, France, frederic.renou@chu-reunion.fr

BOJARSKI Aude, CHU Felix Guyon, Saint Denis, France, aude.bojarski@chu-reunion.fr

PAUL Caroline, CHU Felix Guyon, Saint Denis, France, caroline.paul@chu-reunion.fr

BORSU Karine, CHU Felix Guyon, Saint Denis, France, karine.borsu@chu-reunion.fr

GORLIN Angelique, CHU Felix Guyon, Saint Denis, France, angelique.gorlin@chu-reunion.fr

DI BERNARDO Servane, CHU Felix Guyon, Saint Denis, France, servane.dibernardo@chu-reunion.fr

TRUONG VAN UT Carole, CHU Felix Guyon, Saint Denis, France, carole.truong-van-ut@chu-reunion.fr

RENAUD Stephane, CHU Felix Guyon, Saint Denis, France, stephane.renaud@chu-reunion.fr

VIGNOLES Antoine, CHU Felix Guyon, Saint Denis, France, antoine.vignoles@chu-reunion.fr

FOCH Emilie, CHU Felix Guyon, Saint Denis, France, emilie.foch@chu-reunion.fr

MASSE Laurie, CHU Felix Guyon, Saint Denis, France, laurie.masse@chu-reunion.fr

GRAND Hubert, robert boulin, Libourne, France, hubert.grand@ch-libourne.fr

FERRAND Helene, robert boulin, Libourne, France, helene.ferrand@ch-libourne.fr

RAFFAITIN-CARDIN Christelle, robert boulin, Libourne, France, christelle.raffaitin@ch-libourne.fr

ZELLAGUI Hadjer, robert boulin, Libourne, France, hadjer.zellagui@ch-libourne.fr

CASTANG-BRACHET Celine, robert boulin, Libourne, France, celine.castang@ch-libourne.fr

BOURY Frederique, robert boulin, Libourne, France, frederique.boury@ch-libourne.fr

ALVAREZ TENA Ana, CH Albi, Albi, France, ana.alvareztena@ch-albi.fr

MOURA Isabelle, CH Albi, Albi, France, isabelle.moura@ch-albi.fr

KALFON Pierre, LOUIS PASTEUR, Le Coudray, France, pkalfon@ch-chartres.fr

DARASTEANU Juliana, LOUIS PASTEUR, Le Coudray, France, jdarasteanu@ch-cahrtres.fr

MONIER Arnaud, LOUIS PASTEUR, Le Coudray, France, amonier@ch-chartres.fr

FOUCAULT Pascal, LOUIS PASTEUR, Le Coudray, France, pfoucault@ch-chartres.fr

DEPUILLE Alexandra, LOUIS PASTEUR, Le Coudray, France, adepuille@ch-chartres.fr

LAUGIER-ROBIOLLE Stéphanie, CH D'AUCH, 32000, France, s.laugier-robiolle@ch-auch.fr

CANEIRO Patrick, CH D'AUCH, 32000, France, p.caneiro@ch-auch.fr

BASSO Maud, CH D'AUCH, 32000, France, maud.basso@ch-auch.fr

LARGER Etienne, Hôpital COCHIN, Paris, France, etienne.larger@aphp.fr

BENZENATI Wahiba, Hôpital COCHIN, Paris, France, wahiba.benzenati-ext@aphp.fr

AIT BACHIR Leila, Hopital francobritannique, Levallois, France, leila.aitbachir@ihfb.org

CUSSAC PILLEGAND Camille, Hopital francobritannique, Levallois, France, camille.cussac-pillegand@ihfb.org

VASSE Marc, Hopital francobritannique, Suresnes, France, marc.vasse@hopital-foch.fr

MICHARD Christophe, CH du Forez, Montbrison, France, christophe.michard@ch-forez.fr

MONTANIER Nathanaëlle, CH du Forez, Montbrison, France, nathanaelle.montanier@ch-forez.fr

MILLOT Luc, CH du Forez, Montbrison, France, luc.millot@ch-forez.fr

CREPET Françoise, CH du Forez, Montbrison, France, francoise.crepet@ch-forez.fr

RATSIMBA Danielle, CH du Forez, Montbrison, France, danielle.ratsimba@ch-forez.fr

BOUILLER Kevin, CHU JEAN MINJOZ, Besancon, France, kbouiller@chu-besancon.fr

BRUCKERT Isabelle, CHU JEAN MINJOZ, Besancon, France, ibruckert@chu-besancon.fr

CLERGEOT Annie, CHU JEAN MINJOZ, Besancon, France, aclergeot@chu-besancon.fr

SCHILLO Franck, CHU JEAN MINJOZ, Besancon, France, fschillo@chu-besancon.fr

VIGNES Dorothee, CHU Antoine Béclère, Clamart, France, dorothee.vignes@aphp.fr

LACHGAR Hamoud, CHU Antoine Béclère, Clamart, France, hamoud.lachgar@aphp.fr

LAMBERT DE CURSAY Claire, CHU Antoine Béclère, Clamart, France, claire.lambertdecursay@aphp.fr

LEVANTE Stéphane, CHU Antoine Béclère, Clamart, France, stephane.levante@aphp.fr

AUREGAN Jean Charles, CHU Antoine Béclère, Clamart, France, jean-charles.auregan@aphp.fr

MERLET Antoine, CH Bretagne Atlantique, Vannes, France, antoine.merlet@ch-bretagne-atlantique.fr

ZARAGOZA Cécile, CH Bretagne Atlantique, Vannes, France, cecile.zaragora@ch-bretagne-atlantique.fr

ARNAULT Gwénaëlle, CH Bretagne Atlantique, Vannes, France, gwenaelle.arnault@ch-bretagne-atlantique.fr

LE LOUPP Anne-Gaëlle, CH Bretagne Atlantique, Vannes, France, anne-gaëlle-le8loupp@ch-bretagne-atlantique.fr

LESIEUR Olivier, Saint Louis, La Rochelle, France, olivier.lesieur@ch-laroche.fr

RONCATO-SABERAN Mariam, Saint Louis, La Rochelle, France, mariam.roncato@ch-laroche.fr

GOUET Didier, Saint Louis, La Rochelle, France, didier.gouet@ch-laroche.fr

LEMARIE Romain, Saint Louis, La Rochelle, France, romain.lemarie@ch-laroche.fr

ALLANO Hong\_An, Saint Louis, La Rochelle, France, hong-an.allano@ght-atlantique17.fr

VIVIER Emmanuel, Saint-Joseph Saint-Luc, Lyon, France, evivier@ch-stjoseph-stluc-lyon.fr

PARISSET Caroline, Saint-Joseph Saint-Luc, Lyon, France, cpariset@ch-stjoseph-stluc-lyon.fr

LUYTON Cédric, Saint-Joseph Saint-Luc, Lyon, France, cluyton@ch-stjoseph-stluc-lyon.fr

PECQUET Mathieu, Saint-Joseph Saint-Luc, Lyon, France, mpecquet@ch-stjoseph-stluc-lyon.fr

PERARD Laurent, Saint-Joseph Saint-Luc, Lyon, France, lperard@ch-stjoseph-stluc-lyon.fr

VUILLERMOZ-BLAS Sylvie, Saint-Joseph Saint-Luc, Lyon, France, svuillermoz@ch-stjoseph-stluc-lyon.fr

KACKI Nicolas, CHD de Vendée, La Roche Sur Yon, France, nicolas.kacki@chd-vendée.fr

CHARRIER Patricia, CHD de Vendée, La Roche Sur Yon, France, patricia.charrier@chd-vendée.fr

DESROYS DU ROURE Françoise, CHD de Vendée, La Roche Sur Yon, France, francois.desroysduruore@chd-vendee.fr

BONNEFONT-ROUSSELOT Dominique, Pitié-Salpêtrière, Paris, France, [dominique.rousselet@aphp.fr](mailto:dominique.rousselet@aphp.fr)

LAROCHE Suzanne, Pitié-Salpêtrière, Paris, France, Suzanne.laroche@aphp.fr

PHAN Franck, Pitié-Salpêtrière, Paris, France, franck.phan@aphp.fr

HARTEMANN Agnès, Pitié-Salpêtrière, Paris, France, agnes.hartemann@aphp.fr

CAUSSY Cyrielle, CHU LYON SUD, Pierre Benite, France, cyrielle.caussy@chu-lyon.fr

BLOND Emilie, CHU LYON SUD, Pierre Benite, France, emilie.blond@chu-lyon.fr

GUERIN Claude, Hôpital Croix Rousse, Lyon, France, claud.guerin@chu-lyon.fr

PERPOINT Thomas, Hôpital Croix Rousse, Lyon, France, thomas.perpoint@chu-lyon.fr

MOULIN Philippe, Hôpital Louis pradel, Lyon, France, philippe.moulin@chu-lyon.fr

CARTIER Régine, Hôpital Louis pradel, Lyon, France, regine.cartier@chu-lyon.fr

HARIRI Geoffroy, Hôpital Saint-Antoine, Paris, France, geoffroy.hariri@aphp.fr

CHOPIN Dorothée, Hôpital Saint-Antoine, Paris, France, dorothee.chopin@aphp.fr

BOURCIGAUX Nathalie, Hôpital Saint-Antoine, Paris, France, nathalie.bourcigaux@aphp.fr

CHAIGNEAU Emmanuelle, Hôpital Saint-Antoine, Paris, France, emmanuelle.chaigneau@aphp.fr

CHRISTIN-MAITRE Sophie, Hôpital Saint-Antoine, Paris, France, sophie.christin-maitre@aphp.fr

DONADILLE Bruno, Hôpital Saint-Antoine, Paris, France, bruno.donadille@aphp.fr

FEVE Bruno, Hôpital Saint-Antoine, Paris, France, bruno.feve@aphp.fr

LAMOTHE Sophie, Hôpital Saint-Antoine, Paris, France, sophie.lamothe@aphp.fr

SARFATI Julie, Hôpital Saint-Antoine, Paris, France, julie.sarfati@aphp.fr

PERNET Pascal, Hôpital Saint-Antoine, Paris, France, pascal.pernet@aphp.fr

CHAMBON Anne, CH Côtes Basques, Bayonne, France, achambon@ch-cotebasque.fr

DEMARSY Delphine, CH Côtes Basques, Bayonne, France, ddemarsy@ch-cotebasque.fr

CAMPAGNE Hugo, CH Côtes Basques, Bayonne, France, hcampagne@ch-cotebasque.fr

LATIL-PLAT Françoise, CH Avignon, Avignon, France, fplat@ch-avignon.fr

BERNE Monica, CH Avignon, Avignon, France, MBeyrne@ch-avignon.fr

GRINAND Marilyne, CH Avignon, Avignon, France, GRINAND.Marilyne@ch-avignon.fr

TOUZET Marion, CH Avignon, Avignon, France, TOUZET.Marion@ch-avignon.fr

ZABULON Audrey, CHU Martinique, Fort de France, France, audrey.zabulon@chu-martinique.fr

CRASPAG Jocelyne, CHU Martinique, Fort de France, France, jocelyne.craspag@chu-martinique.fr

LEDOUX Catherine, CHU Martinique, Fort de France, France, catherine.ledoux@chu-martinique.fr

CONTARET Cedric, CHU Martinique, Fort de France, France, Cedric.CONTARET@chu-martinique.fr

JANAND-DELENNE Blandine, CH du Pays d'Aix, Aix en Provence, France, bdelenne@ch-aix.fr

GIRAUD Anaïs, CH du Pays d'Aix, Aix en Provence, France, agiraud@ch-aix.fr

LACRIMINI Marie Lou, CH du Pays d'Aix, Aix en Provence, France, mlacrimini@ch-aix.fr

ARRIVIE Joëlle, CH de Bigorre, Tarbes, France, jarrivie@ch-tarbes-vic.fr

ANCELLE Deborah, CH Le Havre, Le Havre, France, deborah.ancelle@ch-havre.fr

GUILLOIS Carine, CH Le Havre, Le Havre, France, carine.guillois@ch-havre.fr

FREMY Bénédicte, CH Agen, Agen, France, fremyb@ch-agen-nerac.fr

CHAALAL Amina, CH Agen, Agen, France, chaalalam@ch-agen-nerac.fr

BARRANDE Gaëlle, CH Argenteuil, Argenteuil, France, gaelle.barrande@ch-argenteuil.fr

DORANGE Anne, CH Le Mans, Le Mans, France, adorange@ch-lemans.fr

ROUANET Eglantine, CH Le Mans, Le Mans, France, erouanet@ch-lemans.fr

SERET-BEGUE Dominique, CH Gonesse, Gonesse, France, dominique.seret-begue@ch-gonesse.fr

SAOUD Audrey, CH Gonesse, Gonesse, France, audrey.saoud@ch-gonesse.fr

GUEDJ Anne-Marie, CH Nîmes, Nîmes, France, anne.marie.guedj@chu-nimes.fr

BEDOS Nathalie, CH Nîmes, Nîmes, France, nathalie.bedos@chu-nimes.fr

VELAYOUDOM Fritz-Line, CHU Guadeloupe, Les Abymes, France, fritz-line.velayoudom@univ-antilles.fr

DUMAS Marie, Hôpital St Vincent de Paul, Lille, France, dumas.marie@ghicl.net

GONDA Benoite, Hôpital St Vincent de Paul, Lille, France, Gonda.Benoite@ghicl.net

COFFIN Christine, CH Perigueux, Perigueux, France, christine.coffin@ch-perigueux.fr

GIBIAT Stéphanie, CH Perigueux, Perigueux, France, urc@ch-perigueux.fr

LUNGO Myriam, CH de Bastia, Bastia, France, myriam.lungo@gmail.com

BULLY Chantal, Les Portes du Sud, Venissieux, France, C.BULLY@LESPORTESDUSUD.NET

SERUSCLAT Pierre, Les Portes du Sud, Venissieux, France, p.serusclat@lesportesdusud.net

BULLY Stella, Les Portes du Sud, Venissieux, France, stellabully.ecsel@gmail.com

CARRE Patricia, Les Portes du Sud, Venissieux, France, patcarre69@gmail.com

LEBERRE Jean-Philippe, Medipôle Hôpital Mutualiste, Villeurbanne, France, j.leberre@resamut.fr

ELKHOURY Carlos, Medipôle Hôpital Mutualiste, Villeurbanne, France, c.elkhoury@resamut.fr

THIEUX Marine, Medipôle Hôpital Mutualiste, Villeurbanne, France, m.thieux@resamut.fr

PARADISI-PRIEUR Laetitia, Medipôle Hôpital Mutualiste, Villeurbanne, France, l.paradisi-prieur@resamut.fr

## DATA SHARING STATEMENT

[What data will be made available \(deidentified participant data, participant data with identifiers, data dictionary, or other specified data set\):](#)

No sharing of participant data is allowed by our regulatory authorities. So far, French regulations have not validated deidentified data or avatar for data sharing. Our statement might be modified in case French law changes.

[Whether additional, related documents will be available \(eg, study protocol, statistical analysis plan, informed consent form\)](#)

We will be happy to share study protocol, SAP and information document.

• [When these data will be available \(beginning and end date, or “with publication”, as applicable\)](#)

Study protocol, SAP and information document will be made available with publication.

Data dictionary will be made available Summer 2020 (JULY 15<sup>th</sup>)

• [Where the data will be made available \(including complete URLs or email addresses if relevant\);](#)

The CORONADO website is not active yet but we will give access to the scientific committee through our website, as soon as it is launched.

Direct requests can be directed to PI (bertrand.cariou@univ-nantes.fr) or Chairman of the scientific committee (samy.hadjadj@univ-nantes.fr)

• [By what access criteria data will be shared \(including with whom, for what types of analyses, by what mechanism – eg, with or without investigator support, after approval of a proposal, with a signed data access agreement - or any additional restrictions\).](#)

Our data-base is open for any collaborative work with priority to academic partnership. Any proposal for collaboration requires examination by the scientific committee and the sponsor (CHU Nantes). A structured application proposal for collaboration will be available on request.
